# Supplementary material for: The Attenuating Effect of the Intraovarian Bone Morphogenetic Protein 4 on Age-Related Endoplasmic Reticulum Stress in Chicken Follicular Cells
Source: Hindawi journal article supplement (doi:10.1155/2020/4175613), 2020-06-09
Supplement: f1 [file 4175613.f1.pdf]

Supplementary TABLE 1 Composition and nutrient level of the basal diets

| Ingredients  | Content (%) |
|--------------|-------------|
| Corn         | 65.5        |
| Bran         | 2.5         |
| Soybean meal | 29          |
| Premix 1     | 3           |

1 Supplied per kilogram of premix: dl-a-tocopherol acetate  $\geq$  280 mg; Sodium menadiones bisulfite, 30~96 mg; thiamine nitrate  $\geq$  38 mg; vitamin B2  $\geq$  60 mg; pyridoxine hydrochloride  $\geq$  60 mg; vitamin B12  $\geq$  0.2 mg; nicotinamide  $\geq$  420 mg; D-calcium pantothenate  $\geq$  420 mg; folic acid  $\geq$  12.0 mg; D-biotin  $\geq$  3.0 mg; choline chlorlde  $\geq$  5.6 g; vitamin A acetate, 160000~200000 IU; vitamin D3, 4.4~100 mg; Cu, 140~420 mg; Fe,  $1.6 \times 10^3 \sim 1.3 \times 10^4$ ; Mn,  $1.2 \times 10^3 \sim 3.0 \times 10^3$ ; Zn,  $1.2 \times 10^3 \sim 2.4 \times 10^3$ ; Se, 2.0~6.0 mg; I, 6.0~18 mg; methionine, 2.6%~5.2%; P, 1.8%~5.0%; Ca, 5.0%~20%; NaCl, 4.0%~9.0%; H<sub>2</sub>O  $\leq$  10%.
